# Supplementary material
Source: Springer Nature journal article supplement (https://www.springermedizin.de/resource/supplementary/12961_2012_264_MOESM5_ESM.pdf/9570920)

### GERD/GDP and GDP per capita

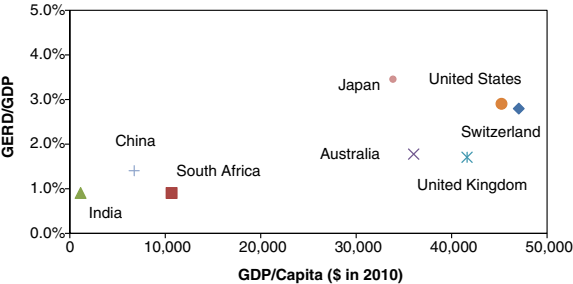

Supplement: MOESM5 [file 9570920]
